# Supplementary material
Source: Springer Nature journal article supplement (https://www.springermedizin.de/resource/supplementary/13023_2008_119_MOESM3_ESM.pdf/9641674)

*Amino acid polymorphisms; truncations*

*Frameshift mutations*

*Splice site mutations*

*Deletions*

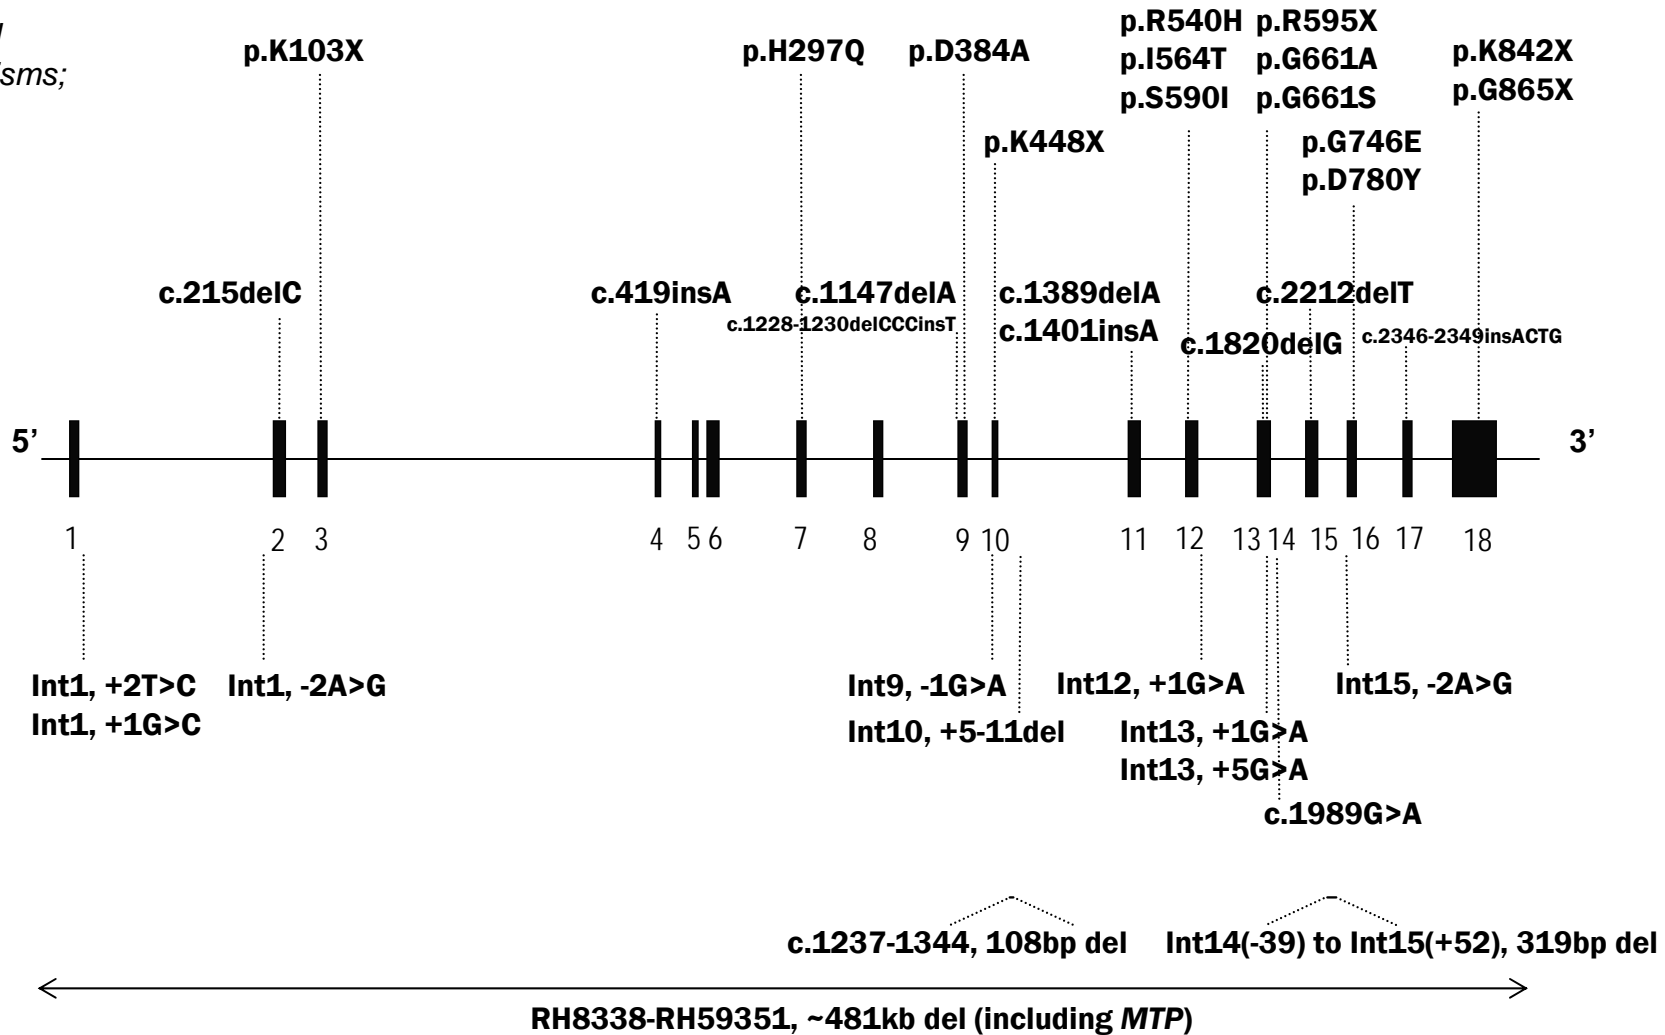

Supplement: MOESM3 [file 9641674]
